# Supplementary material
Source: MDPI journal article supplement (https://www.mdpi.com/2304-6740/11/12/478)
Supplement: s1 [file s1]

## **Supplemental Material**

### **$\text{Nb}_2\text{S}_4(\text{CS}_2\text{NH}_2)_4$ – A new precursor for $\text{NbS}_2$ and its transition metal inserted derivatives**

S. Mangelsen, P. Zimmer, C. Näther, W. Bensch

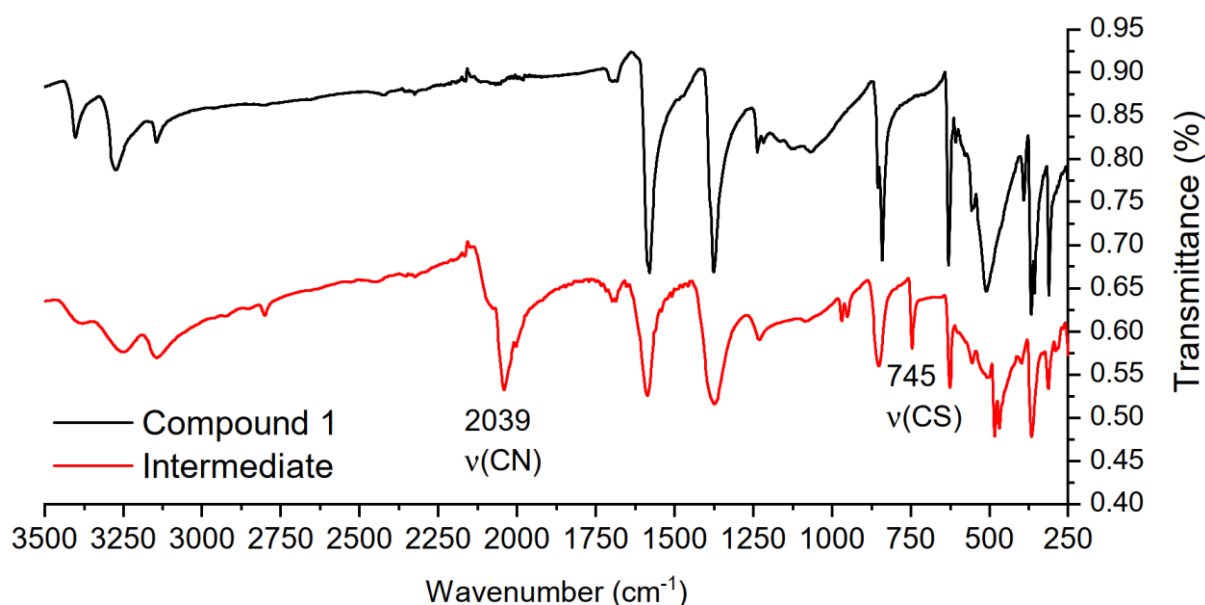

Figure S1: Comparison of the IR-spectra of **1** and the intermediate isolated directly after mixing the solutions of  $\text{NH}_4\text{CS}_2\text{NH}_2$  and  $[\text{Nb}_2\text{S}_4(\text{NCS})_8]^{4-}$ . Indicated are the two strongest bands of the NCS-ligand.

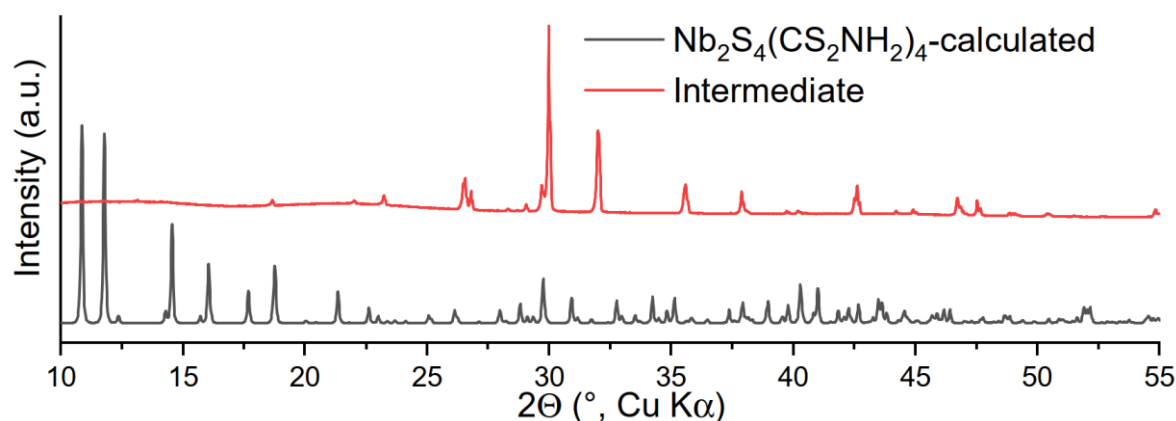

Figure S2: Comparison of the XRPD patterns for the intermediate in the preparation of **1** and the anhydrate of **1**.

Further discussion of the intermediate in the preparation of **1**:

The diffraction pattern in Figure S2 can be indexed with an orthorhombic unit cell of  $1375 \text{ \AA}^3$  volume. This corresponds to 60 atoms in the unit cell assuming  $23 \text{ \AA}^3$  per non H-atom like for **1**. It is likely that  $Z = 2$ . EDX spectroscopy yielded a ratio of Nb:K:S of 2:3:13. The incorporation of potassium makes a charged complex anion likely with some remaining thiocyanate ligands (c.f. IR spectrum in Figure S1) that create the net negative charge. The crystal structure could not be solved from XRPD data and single crystal growth of the soluble intermediate failed. Thus the structure remains unclear.

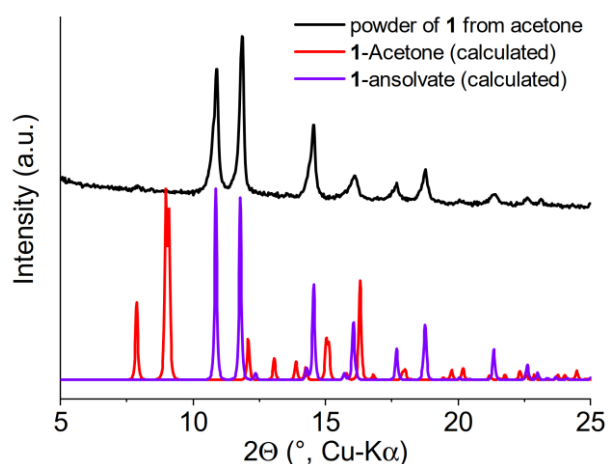

Figure S3: Comparison of the XRPD pattern obtained for **1** crystallized from acetone compared to the crystal structure of **1**-Acetone and the ansolvate.

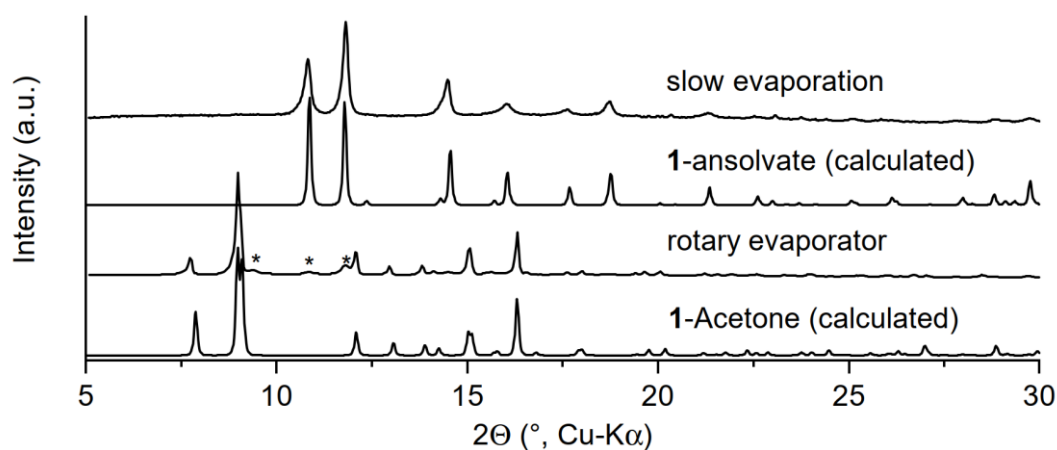

Figure S4: Comparison of XRPD patterns dry residues obtained after drying solution of  $\text{Nb}_2\text{S}_4(\text{CS}_2\text{NH}_2)_3$  in acetone under different conditions. Calculated patterns are shown for comparison. Unidentified reflections are marked with an asterisk.

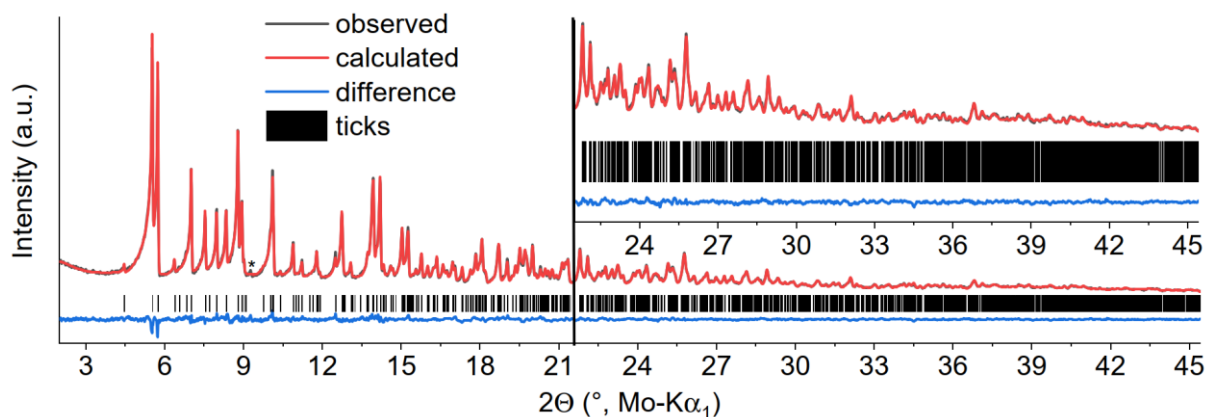

Figure S5: Difference plot of the final Rietveld refinement for  $\text{Co}(\text{CS}_2\text{NH}_2)_3 \cdot \text{H}_2\text{O}$ . The unindexed line is marked with an asterisk.

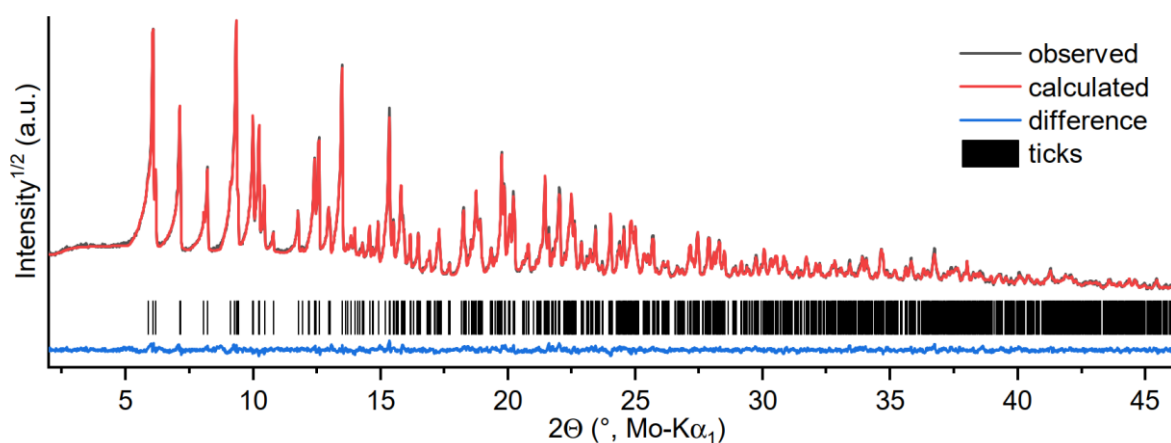

Figure S6: Difference plot of the final Rietveld refinement of the crystal structure of  $\text{Pd}(\text{CS}_2\text{NH}_2)_2$ .

Table S1 Details of the refinement for  $\text{Co}(\text{CS}_2\text{NH}_2)_3 \cdot \text{H}_2\text{O}$  and  $\text{Pd}(\text{CS}_2\text{NH}_2)_2$ .

| Formula                                | $\text{C}_3\text{H}_8\text{Co}_1\text{N}_3\text{O}_1\text{S}_6$ | $\text{C}_2\text{H}_4\text{N}_2\text{Pd}_1\text{S}_4$ |
|----------------------------------------|-----------------------------------------------------------------|-------------------------------------------------------|
| MW, g mol <sup>-1</sup>                | 353.45                                                          | 290.71                                                |
| Crystal system                         | monoclinic                                                      | monoclinic                                            |
| Space group                            | $P2_1/c$                                                        | $P2_1/c$                                              |
| $a$ , Å                                | 7.15513(14)                                                     | 9.07466(13)                                           |
| $b$ , Å                                | 14.6650(3)                                                      | 10.06595(15)                                          |
| $c$ , Å                                | 11.7192(2)                                                      | 11.35377(16)                                          |
| $\alpha$ , °                           | 90                                                              | 90                                                    |
| $\beta$ , °                            | 99.0641(19)                                                     | 130.4697(8)                                           |
| $\gamma$ , °                           | 90                                                              | 90                                                    |
| $V$ , Å <sup>3</sup>                   | 1214.34(5)                                                      | 788.98(2)                                             |
| $T$ , K                                | 295(2)                                                          | 295(2)                                                |
| $Z$                                    | 4                                                               | 4                                                     |
| $D_{\text{calc}}$ , g cm <sup>-3</sup> | 1.88912(7)                                                      | 2.44770(7)                                            |
| $\Theta_{\text{max}}$ , °              | 45.4                                                            | 46.5                                                  |
| $R_{\text{Bragg}}$                     | 1.53                                                            | 1.41                                                  |
| $R_{\text{wp}}$                        | 3.05                                                            | 3.02                                                  |
| $R_{\text{exp}}$                       | 3.25                                                            | 2.33                                                  |
| GOF                                    | 0.94                                                            | 1.29                                                  |

Table S2. Selected crystal data and results of the structure refinements for compound **1** and **1-Acetone**.

| Compound                                                                     | <b>1</b>                                                                                        | <b>1-Acetone</b>                                                                              |
|------------------------------------------------------------------------------|-------------------------------------------------------------------------------------------------|-----------------------------------------------------------------------------------------------|
| Sum formula                                                                  | C <sub>4</sub> H <sub>8.8</sub> N <sub>4</sub> Nb <sub>2</sub> O <sub>0.4</sub> S <sub>12</sub> | C <sub>16</sub> H <sub>32</sub> N <sub>4</sub> Nb <sub>2</sub> O <sub>4</sub> S <sub>12</sub> |
| MW/g mol <sup>-1</sup>                                                       | 689.89                                                                                          | 914.99                                                                                        |
| Crystal system                                                               | orthorhombic                                                                                    | triclinic                                                                                     |
| Space group                                                                  | <i>Pbcn</i>                                                                                     | <i>P</i> -1                                                                                   |
| <i>a</i> / Å                                                                 | 10.9572(2)                                                                                      | 7.4929(6)                                                                                     |
| <i>b</i> / Å                                                                 | 12.1617(3)                                                                                      | 10.9104(8)                                                                                    |
| <i>c</i> / Å                                                                 | 15.0072(3)                                                                                      | 12.6724(9)                                                                                    |
| $\alpha$ / °                                                                 | 90                                                                                              | 115.449(5)                                                                                    |
| $\beta$ / °                                                                  | 90                                                                                              | 98.079(6)                                                                                     |
| $\gamma$ / °                                                                 | 90                                                                                              | 94.981(6)                                                                                     |
| <i>V</i> / Å <sup>3</sup>                                                    | 1999.83(7)                                                                                      | 913.52(12)                                                                                    |
| <i>T</i> / K                                                                 | 100(2)                                                                                          | 200(2)                                                                                        |
| <i>Z</i>                                                                     | 4                                                                                               | 1                                                                                             |
| <i>D</i> <sub>calc</sub> /g cm <sup>-3</sup>                                 | 2.291                                                                                           | 1.663                                                                                         |
| $\mu$ / mm <sup>-1</sup>                                                     | 2.398                                                                                           | 1.342                                                                                         |
| Crystal size / mm                                                            | 0.03x0.03x0.08                                                                                  | 0.04x0.08x0.14                                                                                |
| <i>T</i> <sub>min</sub> /max                                                 | 0.810/1.000                                                                                     | 0.7069/0.893845                                                                               |
| $\theta_{\text{max}}$                                                        | 28.034                                                                                          | 26.998                                                                                        |
| Refl. collected                                                              | 15477                                                                                           | 9891                                                                                          |
| Unique refl.                                                                 | 2427                                                                                            | 3975                                                                                          |
| <i>R</i> <sub>int</sub>                                                      | 0.0205                                                                                          | 0.0768                                                                                        |
| Refl. [ <i>F</i> <sub>o</sub> > 4σ( <i>F</i> <sub>o</sub> )]                 | 2276                                                                                            | 3365                                                                                          |
| Parameters                                                                   | 106                                                                                             | 179                                                                                           |
| <i>R</i> <sub>1</sub> [ <i>F</i> <sub>o</sub> > 4σ( <i>F</i> <sub>o</sub> )] | 0.0198                                                                                          | 0.0581                                                                                        |
| <i>wR</i> <sub>2</sub> (for all data)                                        | 0.0493                                                                                          | 0.1578                                                                                        |
| GOF                                                                          | 1.122                                                                                           | 1.025                                                                                         |
| $\Delta\rho_{\text{max}}, \Delta\rho_{\text{min}}$ / eÅ <sup>-3</sup>        | 0.952, -0.305                                                                                   | 1.141, -0.937                                                                                 |

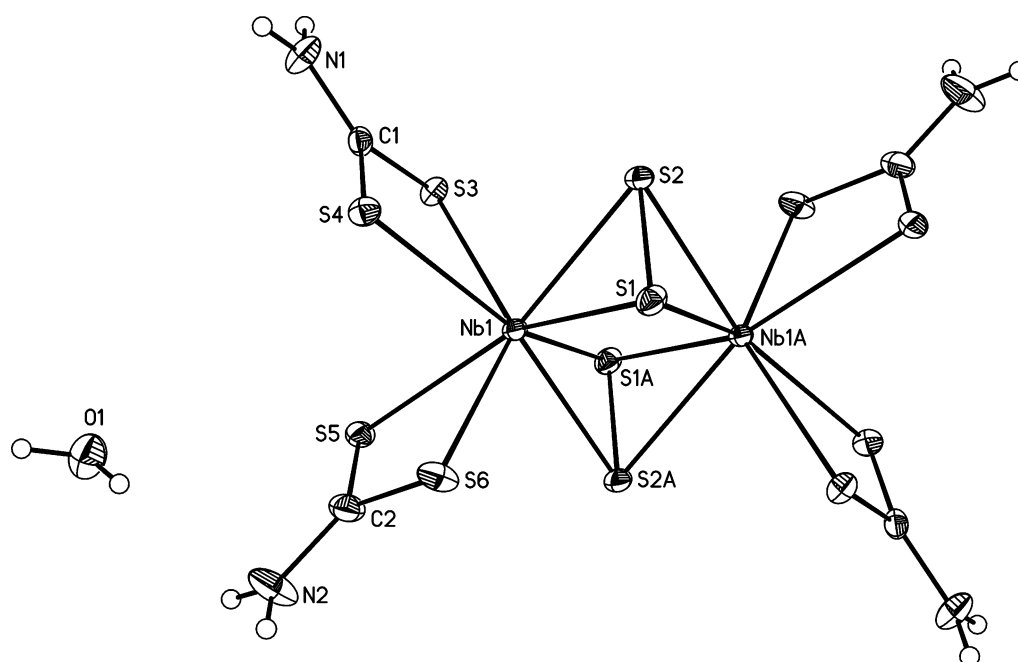

Figure S7. Crystal structure of compound **1** with labeling and displacement ellipsoids drawn at the 50% probability level. Symmetry transformations: A:  $-x+1, -y+1, -z$ .

Table S3. Bond lengths [Å] and angles [°] for compound **1**. Symmetry transformations: A:  $-x+1, -y+1, -z$ .

|                     |             |                   |             |
|---------------------|-------------|-------------------|-------------|
| Nb(1)-S(1)          | 2.5134(5)   | Nb(1)-S(3)        | 2.5945(5)   |
| Nb(1)-S(1)#1        | 2.5105(6)   | Nb(1)-S(4)        | 2.6266(5)   |
| Nb(1)-S(2)#1        | 2.4941(5)   | Nb(1)-S(5)        | 2.6217(5)   |
| Nb(1)-S(2)          | 2.4894(5)   | Nb(1)-S(6)        | 2.5783(6)   |
| Nb(1)-Nb(1)#1       | 2.8650(4)   |                   |             |
| S(1)#1-Nb(1)-S(1)   | 110.459(15) | S(2)-Nb(1)-S(3)   | 81.376(18)  |
| S(1)-Nb(1)-S(3)     | 126.801(18) | S(2)#1-Nb(1)-S(3) | 126.219(18) |
| S(1)#1-Nb(1)-S(3)   | 80.712(17)  | S(2)-Nb(1)-S(4)   | 84.224(17)  |
| S(1)-Nb(1)-S(4)     | 89.601(17)  | S(2)#1-Nb(1)-S(4) | 161.000(18) |
| S(1)#1-Nb(1)-S(4)   | 147.836(18) | S(2)#1-Nb(1)-S(5) | 82.952(17)  |
| S(1)#1-Nb(1)-S(5)   | 88.535(17)  | S(2)-Nb(1)-S(5)   | 161.918(18) |
| S(1)-Nb(1)-S(5)     | 147.707(18) | S(2)#1-Nb(1)-S(6) | 81.991(19)  |
| S(1)-Nb(1)-S(6)     | 80.251(18)  | S(2)-Nb(1)-S(6)   | 125.571(19) |
| S(1)#1-Nb(1)-S(6)   | 127.440(19) | S(3)-Nb(1)-S(4)   | 67.125(17)  |
| S(2)#1-Nb(1)-S(1)   | 90.736(18)  | S(3)-Nb(1)-S(5)   | 80.699(17)  |
| S(2)-Nb(1)-S(1)#1   | 90.912(18)  | S(5)-Nb(1)-S(4)   | 86.650(17)  |
| S(2)-Nb(1)-S(1)     | 47.933(18)  | S(6)-Nb(1)-S(3)   | 134.816(19) |
| S(2)#1-Nb(1)-S(1)#1 | 47.916(18)  | S(6)-Nb(1)-S(4)   | 79.346(18)  |
| S(2)-Nb(1)-S(2)#1   | 109.814(15) | S(6)-Nb(1)-S(5)   | 67.529(17)  |

Table S4. Hydrogen bonds [ $\text{\AA}$  and  $^\circ$ ] for compound **1**. Symmetry transformations used to generate equivalent atoms: #3  $x-1/2, -y+1/2, -z+1$ ; #4  $-x, -y+1, -z+1$ ; #5  $x, -y+1, z-1/2$ ; #6  $-x+1/2, -y+1/2, z-1/2$

| D-H...A             | d(D-H) | d(H...A) | d(D...A) | $\angle(\text{DHA})$ |
|---------------------|--------|----------|----------|----------------------|
| N(1)-H(1A)...S(6)#3 | 0.88   | 2.68     | 3.516(2) | 159.1                |
| N(1)-H(1B)...S(5)#4 | 0.88   | 2.88     | 3.320(2) | 112.6                |
| N(1)-H(1B)...O(1)#4 | 0.88   | 2.45     | 3.173(5) | 140.1                |
| N(2)-H(2A)...S(3)#5 | 0.88   | 2.60     | 3.349(2) | 143.2                |
| N(2)-H(2B)...S(4)#6 | 0.88   | 2.83     | 3.348(2) | 119.1                |
| O(1)-H(1)...N(2)    | 0.84   | 2.29     | 2.962(3) | 137.7                |

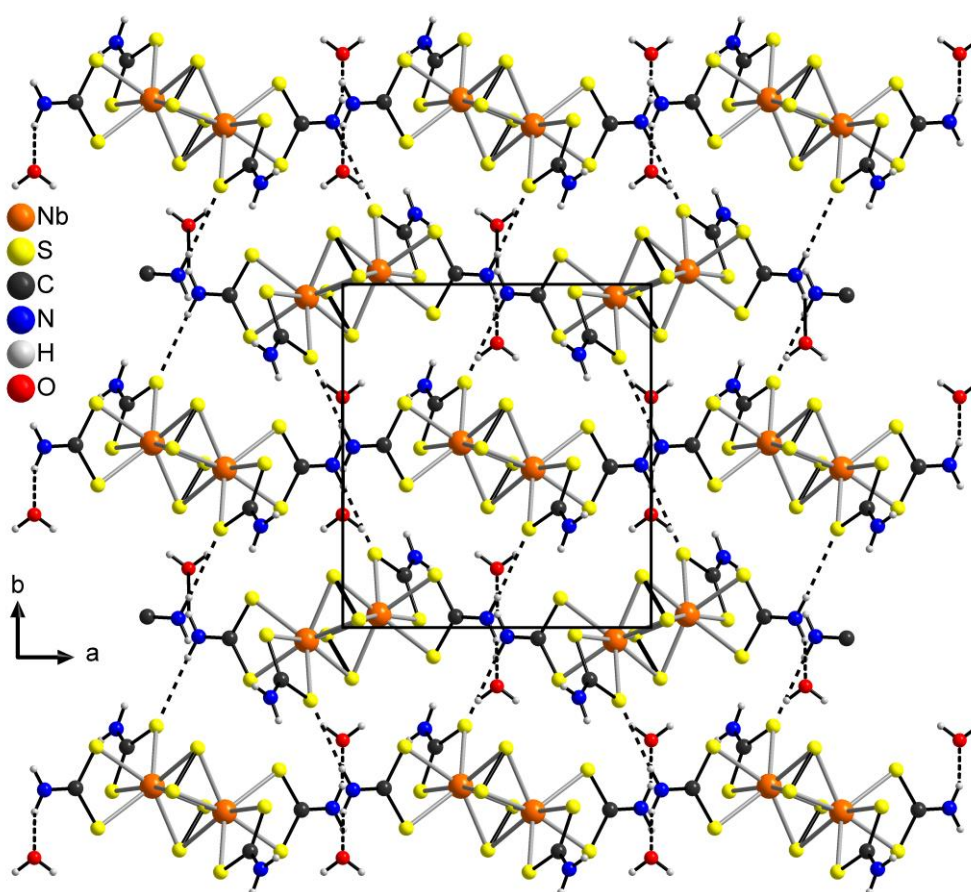

Figure S8. Crystal structure of compound **1** with view along the crystallographic  $c$  axis and intermolecular hydrogen bonding shown as dashed lines.

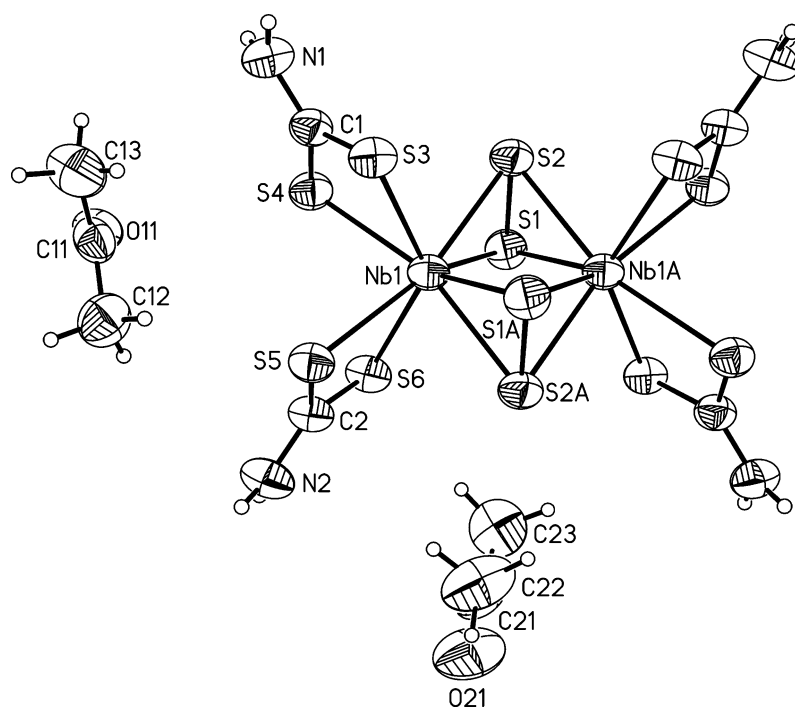

Figure S9. Crystal structure of compound **1-Acetone** with labeling and displacement ellipsoids drawn at the 50% probability level. Symmetry transformations:  $-x+1, -y+1, -z+1$ .

Table S5. Bond lengths [Å] and angles [°] for compound **1-Acetone**. Symmetry transformations:  $-x+1, -y+1, -z+1$ .

|                   |            |                  |            |
|-------------------|------------|------------------|------------|
| Nb(1)-S(2)        | 2.4884(12) | Nb(1)-S(6)       | 2.5667(12) |
| Nb(1)-S(2A)       | 2.4990(12) | Nb(1)-S(3)       | 2.5765(12) |
| Nb(1)-S(1A)       | 2.5026(12) | Nb(1)-S(4)       | 2.6104(12) |
| Nb(1)-S(1)        | 2.5062(12) | Nb(1)-S(5)       | 2.6252(12) |
| Nb(1)-Nb(1A)      | 2.8693(8)  |                  |            |
| S(2)-Nb(1)-S(2A)  | 109.76(3)  | S(6)-Nb(1)-S(3)  | 136.80(4)  |
| S(2)-Nb(1)-S(1A)  | 91.00(4)   | S(2)-Nb(1)-S(4)  | 84.00(4)   |
| S(2A)-Nb(1)-S(1A) | 47.61(4)   | S(2A)-Nb(1)-S(4) | 161.58(4)  |
| S(2)-Nb(1)-S(1)   | 47.68(4)   | S(1A)-Nb(1)-S(4) | 147.53(4)  |
| S(2A)-Nb(1)-S(1)  | 90.67(4)   | S(1)-Nb(1)-S(4)  | 89.99(4)   |
| S(1A)-Nb(1)-S(1)  | 110.10(3)  | S(6)-Nb(1)-S(4)  | 79.70(4)   |
| S(2)-Nb(1)-S(6)   | 124.36(4)  | S(3)-Nb(1)-S(4)  | 67.77(4)   |
| S(2A)-Nb(1)-S(6)  | 82.34(4)   | S(2)-Nb(1)-S(5)  | 162.43(4)  |
| S(1A)-Nb(1)-S(6)  | 127.81(4)  | S(2A)-Nb(1)-S(5) | 83.45(4)   |
| S(1)-Nb(1)-S(6)   | 79.35(4)   | S(1A)-Nb(1)-S(5) | 89.76(4)   |
| S(2)-Nb(1)-S(3)   | 80.73(4)   | S(1)-Nb(1)-S(5)  | 146.82(4)  |
| S(2A)-Nb(1)-S(3)  | 125.21(4)  | S(6)-Nb(1)-S(5)  | 67.52(4)   |
| S(1A)-Nb(1)-S(3)  | 79.76(4)   | S(3)-Nb(1)-S(5)  | 82.14(4)   |
| S(1)-Nb(1)-S(3)   | 126.34(4)  | S(4)-Nb(1)-S(5)  | 85.96(4)   |



Table S6. Hydrogen bonds [ $\text{\AA}$  and  $^\circ$ ] for compound **1-Acetone**. Symmetry transformations: #2  $x-1, y, z$ ; #3  $x-1, y+1, z$ ; #4  $-x+1, -y+1, -z+1$ ; #5  $x+1, y, z$ ; #6  $-x+1, -y+2, -z+1$ .

| D-H...A               | d(D-H) | d(H...A) | d(D...A) | $\angle(\text{DHA})$ |
|-----------------------|--------|----------|----------|----------------------|
| N(1)-H(1)...S(5)#2    | 0.88   | 2.56     | 3.439(5) | 175.6                |
| N(1)-H(2)...O(21)#3   | 0.88   | 2.03     | 2.897(7) | 169.8                |
| N(2)-H(3)...O(11)#4   | 0.88   | 2.10     | 2.901(6) | 150.9                |
| N(2)-H(4)...O(11)#5   | 0.88   | 2.08     | 2.894(6) | 153.7                |
| C(12)-H(12B)...S(5)   | 0.98   | 2.93     | 3.822(7) | 151.1                |
| C(13)-H(13C)...S(5)#6 | 0.98   | 2.96     | 3.567(7) | 120.9                |

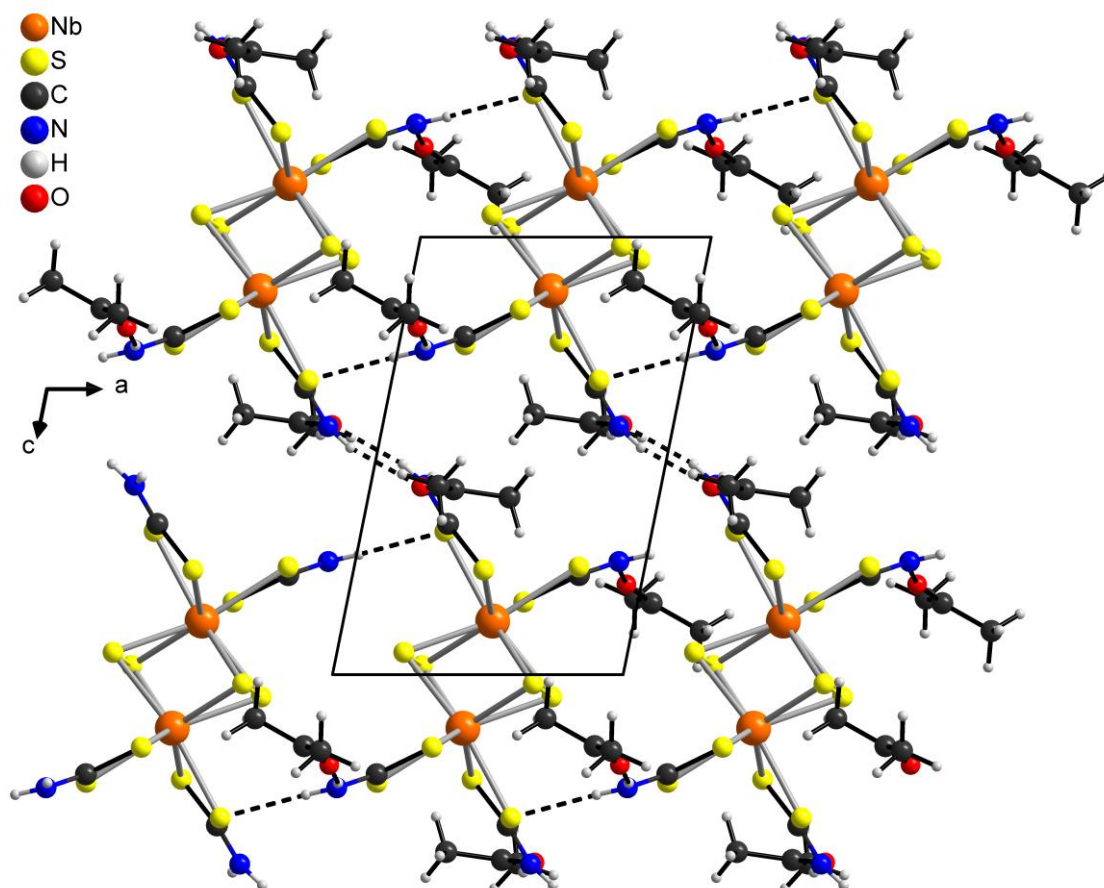

Figure S10. Crystal structure of compound **1-Acetone** with view along the crystallographic  $b$  axis and intermolecular hydrogen bonding shown as dashed lines.

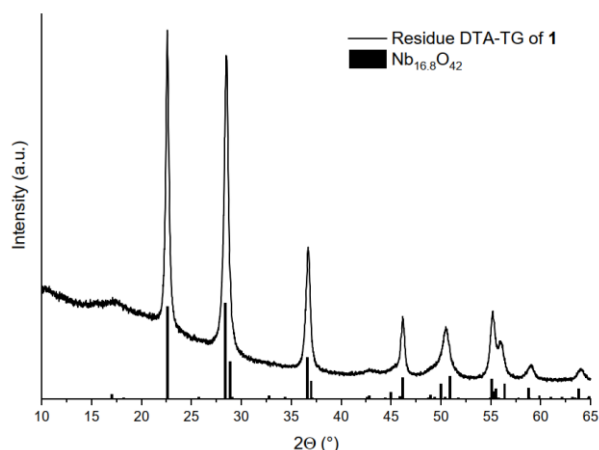

Figure S11: Comparison of the XRPD pattern of the residue of **1** after heating to 600 °C in the DTA-TG experiment. Tick marks are shown for the calculated pattern of Nb<sub>16.8</sub>O<sub>42</sub>. [47]

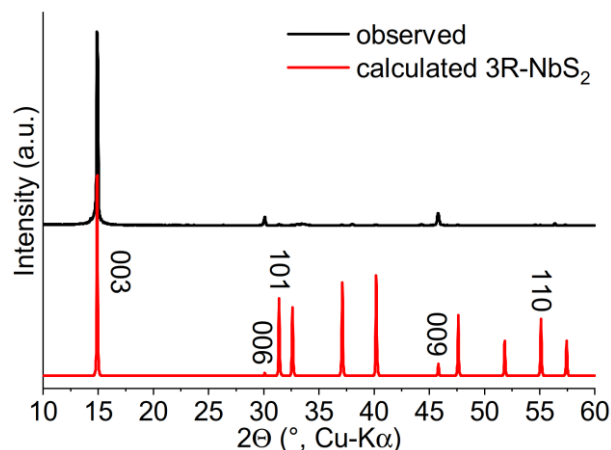

Figure S12: XRPD pattern recorded in reflection geometry of the decomposition product of **1** on a Si/SiO<sub>2</sub> substrate synthesized at 1000 °C in a sealed quartz tube. For comparison the calculated pattern for 3R-NbS<sub>2</sub> [48] is shown. A strong preferred orientation towards the 00/ reflections is evident, which is (for reflection geometry) in line with the layers growing in parallel to the sample surface. Selected Miller indices are shown to highlight the strong preferred orientation of the crystallites on the substrate surface.

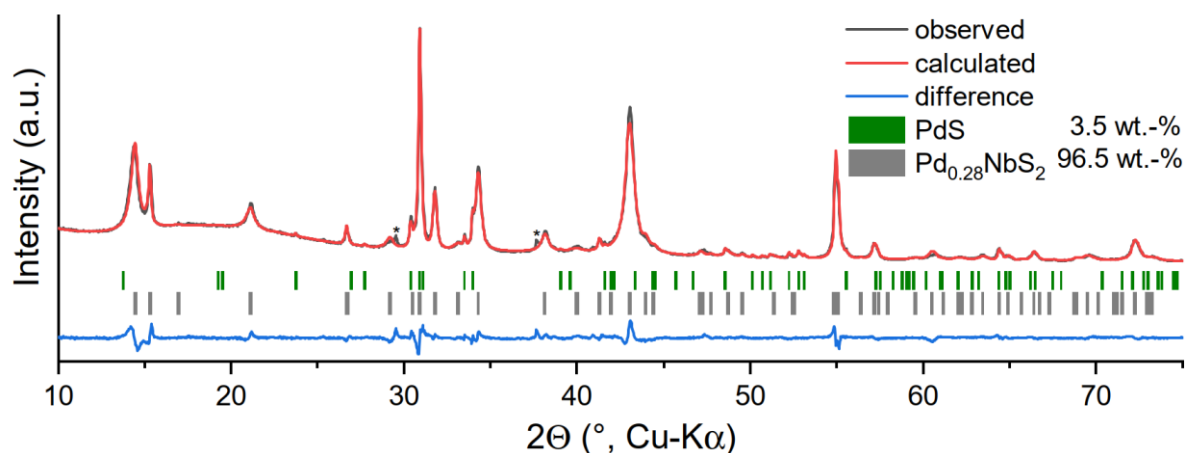

Figure S13: Difference plot of the Rietveld refinement of the product obtained after co-decomposition of **1** and Pd(CS<sub>2</sub>NH<sub>2</sub>)<sub>2</sub>. Unidentified reflections are marked with an asterisk.

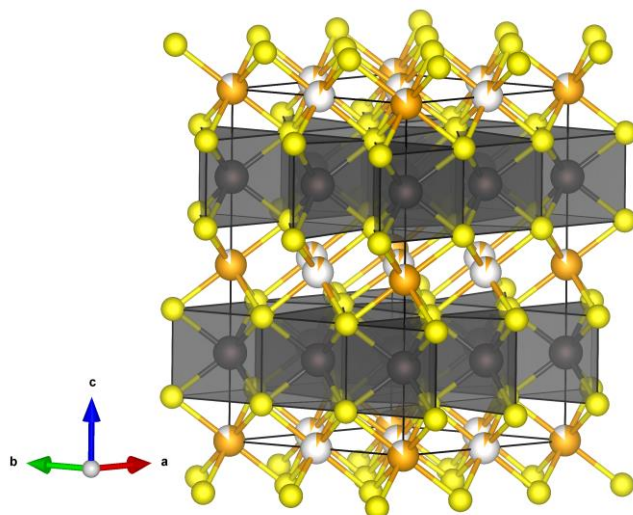

Figure S14: Depiction of the unit cell of  $\text{Pd}_{0.28}\text{NbS}_2$ . Occupancies smaller than one are shown with partially filled spheres. Color code: Pd (orange), Nb (black) and S (yellow).

Table S7: Details of the crystal structure of  $\text{Pd}_{0.28}\text{NbS}_2$ .

|                                        |                                |
|----------------------------------------|--------------------------------|
| Formula                                | $\text{Pd}_{0.28}\text{NbS}_2$ |
| Molecular weight, $\text{g mol}^{-1}$  | 186.84                         |
| Crystal system                         | hexagonal                      |
| Space group                            | $P6_3/mmc$                     |
| $a$ , Å                                | 6.6755(1)                      |
| $b$ , Å                                | 6.6755(1)                      |
| $c$ , Å                                | 12.2298(8)                     |
| $\alpha$ , °                           | 90                             |
| $\beta$ , °                            | 90                             |
| $\gamma$ , °                           | 120                            |
| Cell volume, Å <sup>3</sup>            | 471.97(3)                      |
| $T$ , K                                | 298(2)                         |
| $Z$                                    | 8                              |
| $D_{\text{calc}}$ , $\text{g cm}^{-3}$ | 5.245(6)                       |
| $R_{\text{wp}}$ , %                    | 5.5                            |
| $R_{\text{exp}}$ , %                   | 1.9                            |
| gof                                    | 2.96                           |
| $R_{\text{Bragg}}$ , %                 | 1.30                           |

Table S8: Atomic sites of the crystal structure of  $\text{Pd}_{0.28}\text{NbS}_2$ .

| Atom | Wyckoff site | $x$       | $y$       | $z$       | Occupancy | $B_{\text{iso}} / \text{\AA}^2$ |
|------|--------------|-----------|-----------|-----------|-----------|---------------------------------|
| Nb1  | 2b           | 0         | 0         | 0.25      | 1         | 2.24(6)                         |
| Nb2  | 6h           | 0.4928(4) | 0.9857(8) | 0.25      | 1         | 2.24(6)                         |
| Pd1  | 2a           | 0         | 0         | 0         | 0.863(6)  | 3.0(2)                          |
| Pd2  | 6g           | 0.5       | 0         | 0         | 0.081(2)  | 3.0(2)                          |
| S1   | 4f           | 1/3       | 2/3       | 0.113(1)  | 1         | 2.04(8)                         |
| S2   | 12k          | 0.8285(4) | 0.6569(8) | 0.3744(4) | 1         | 2.04(8)                         |
